# Supplementary material
Source: Springer Nature journal article supplement (https://www.springermedizin.de/resource/supplementary/12913_2011_2126_MOESM3_ESM.pdf/9529746)

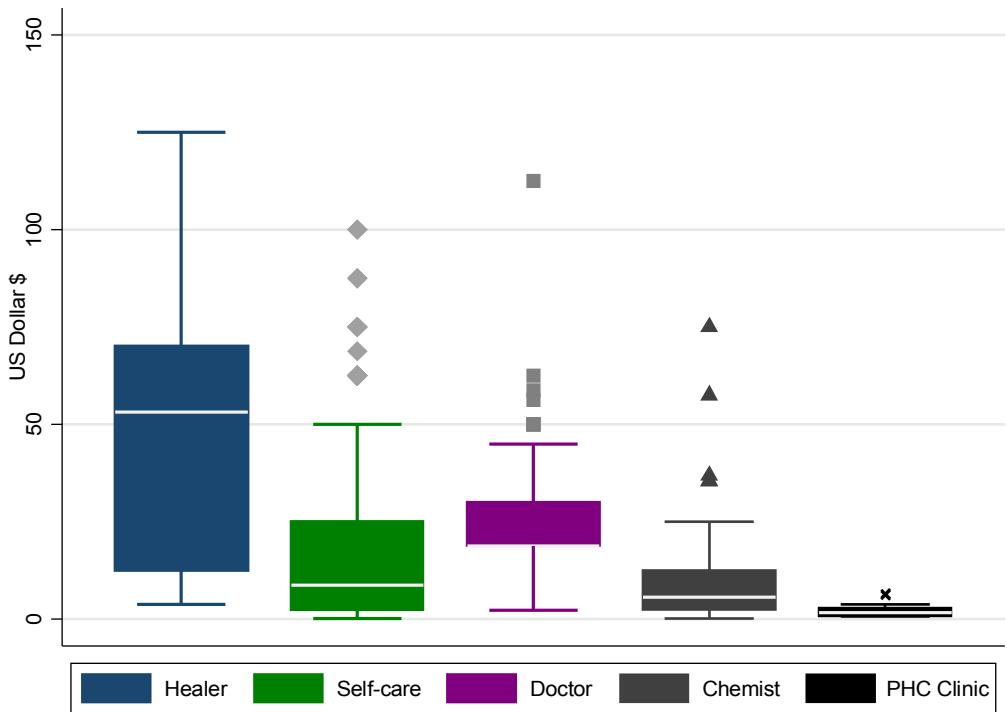

Figure 2: Box and Whisker plot of provider costs incurred by users in US Dollars (N=392)

Supplement: MOESM3 [file 9529746]
